# Supplementary material for: Long-term InSAR and streamflow recession analysis reveal accelerated permafrost degradation in the mining area of Qilian Mountain
Source: Copernicus journal article supplement (doi:10.5194/egusphere-2025-5611), 2026-01-14
Supplement: Supplementary file 1 [file egusphere-2025-5611-supplement.pdf]

# Long-term InSAR and streamflow recession analysis reveal accelerated permafrost degradation in the mining area of Qilian Mountain

Tian Chang<sup>1,2,3</sup>, Yonghong Yi<sup>1,2</sup>, Masato Furuya<sup>4,5</sup>, Huiru Jiang<sup>1,2</sup>, Tao Che<sup>6</sup>, Youhua Ran<sup>6</sup>, Lin Liu<sup>7</sup>, Rongxing Li<sup>1,2</sup>

<sup>1</sup>Center for Spatial Information Science and Sustainable Development Applications, Tongji University, Shanghai, 200092, China.

<sup>2</sup>College of Surveying and Geo-informatics, Tongji University, Shanghai, 200092, China

<sup>3</sup>Graduate School of Science, Hokkaido University, Sapporo, 060-0810, Japan

<sup>4</sup>Department of Earth and Planetary Sciences, Faculty of Science, Hokkaido University, Sapporo, 060-0810, Japan

<sup>5</sup>Arctic Research Center, Hokkaido University, Sapporo, 001-0021, Japan

<sup>6</sup>Heihe Remote Sensing Experimental Research Station, State Key Laboratory of Cryospheric Science and Frozen Soil Engineering, Northwest Institute of Eco-Environment and Resources, Chinese Academy of Sciences, Lanzhou, 730000, China

<sup>7</sup>Department of Earth and Environmental Sciences, Faculty of Science, The Chinese University of Hong Kong, Hong Kong, China

*Correspondence to:* Yonghong Yi (yonghong\_yi@tongji.edu.cn)

## Contents of this file

The supplementary material includes Table S1 and Figs. S1 to S13 that support the main manuscript.

**Table S1:** The information of interferograms obtained from ERS-2, Envisat, ALOS-1, and ALOS-2.

**Figure S1:** Multispectral unmanned aerial vehicle (UAV) survey of surface conditions around the mining area.

**Figure S2:** Sentinel-1 interferogram network and average spatial coherence.

**Figure S3:** Cumulative distribution function matching between Sentinel-1 and ALOS-2 deformation rates.

**Figure S4:** Comparison between actual observed thaw-season deformation and thaw-season deformation scaled using the thawing index.

**Figure S5:** Time series of streamflow recession time constant and model goodness-of-fit obtained using 1-year fitting, 3-year moving-window fitting, and 5-year moving-window fitting.

**Figure S6:** The coherence maps of the interferograms from ALOS-1.

**Figure S7:** The coherence maps of the interferograms from ALOS-2.

**Figure S8:** Time series of cumulative surface deformation from 2016 to 2023.

**Figure S9:** Comparison between Sentinel-1 InSAR deformation time series and GNSS-IR (GNSS Interferometric Reflectometry) measurements at the Yakou station during the snow-free period in 2018.

**Figure S10:** Deformation trend and thaw season deformation around the open-pit mine in the western part of the study area.

**Figure S11:** Comparison of ground surface characteristics at the P1 site near the Jianggang open-pit mine on July 24, 1984 from Keyhole-9 data and on July 16, 2025 from UAV data.

**Figure S12:** Vertical deformation rate maps during different periods.

**Figure S13:** Vertical thaw-season deformation maps during different periods.

**Table S1** The information of interferograms obtained from ERS-2, Envisat, ALOS-1, and ALOS-2.

| Satellite | Image 1<br>(dd/mm/yyyy) | Image 2<br>(dd/mm/yyyy) | Perpendicular baseline<br>(m) | Time span (days) |
|-----------|-------------------------|-------------------------|-------------------------------|------------------|
| ERS-2     | 19970428                | 19970602                | 98                            | 35               |
|           | 19970811                | 19980727                | -239                          | 350              |
| Envisat   | 20031018                | 20051022                | -435                          | 735              |
|           | 20070712                | 20071012                | 702                           | 92               |
| ALOS-1    | 20070712                | 20080714                | -1053                         | 368              |
|           | 20070827                | 20090901                | -853                          | 736              |
|           | 20070827                | 20100904                | 1225                          | 1104             |
|           | 20100720                | 20101020                | 481                           | 92               |
| ALOS-2    | 20190324                | 20200322                | 307                           | 364              |
|           | 20190519                | 20190714                | -25                           | 56               |
|           | 20190714                | 20200322                | 386                           | 252              |
|           | 20200322                | 20210321                | 46                            | 364              |
|           | 20210321                | 20220320                | -273                          | 364              |

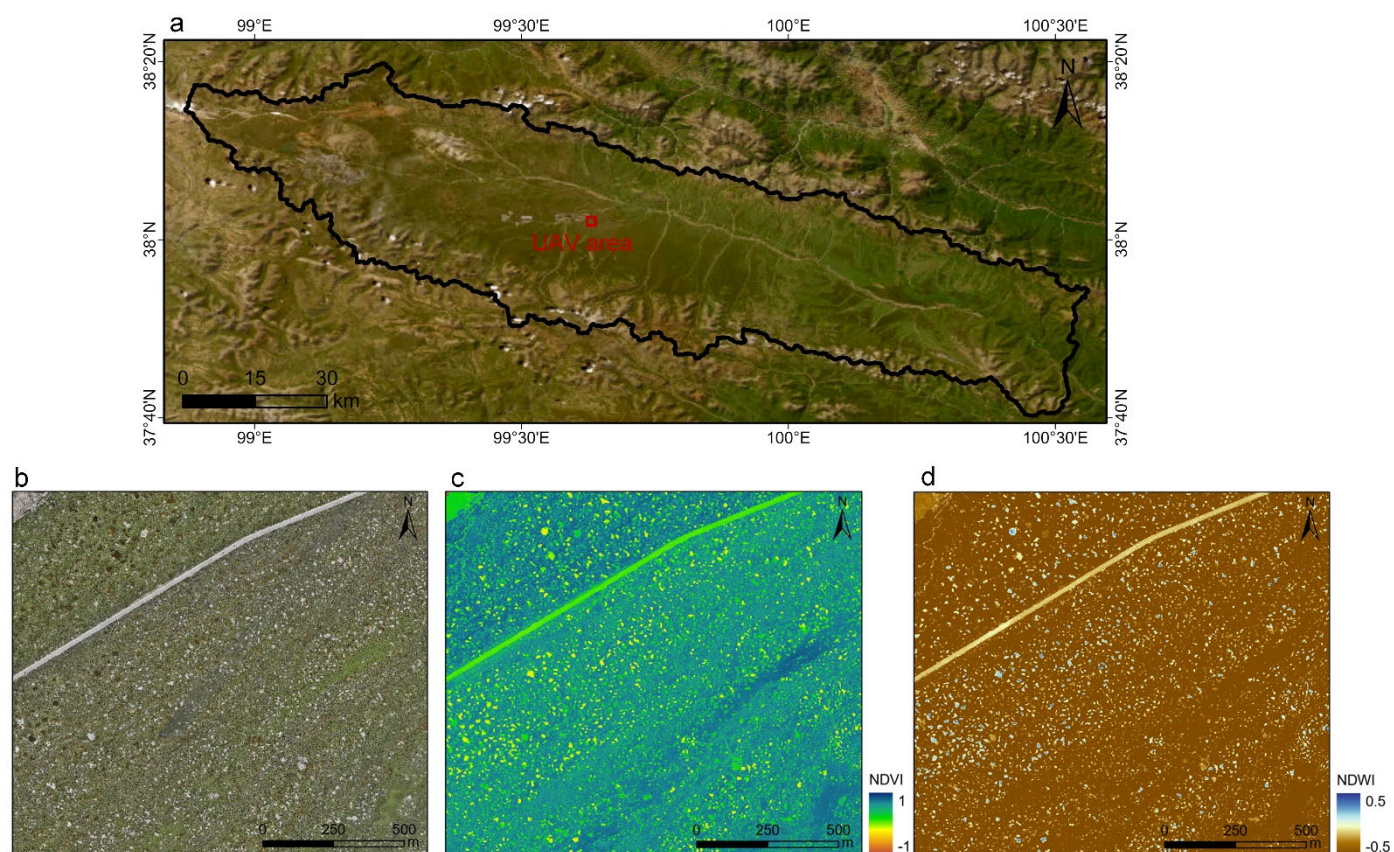

**Figure S1** Multispectral unmanned aerial vehicle (UAV) survey of surface conditions around the mining area: (a) survey location, (b) orthophoto, (c) normalized difference vegetation index (NDVI), and (d) normalized difference water index (NDWI). The optical basemap in panel (a) is from Esri | Powered by Esri.

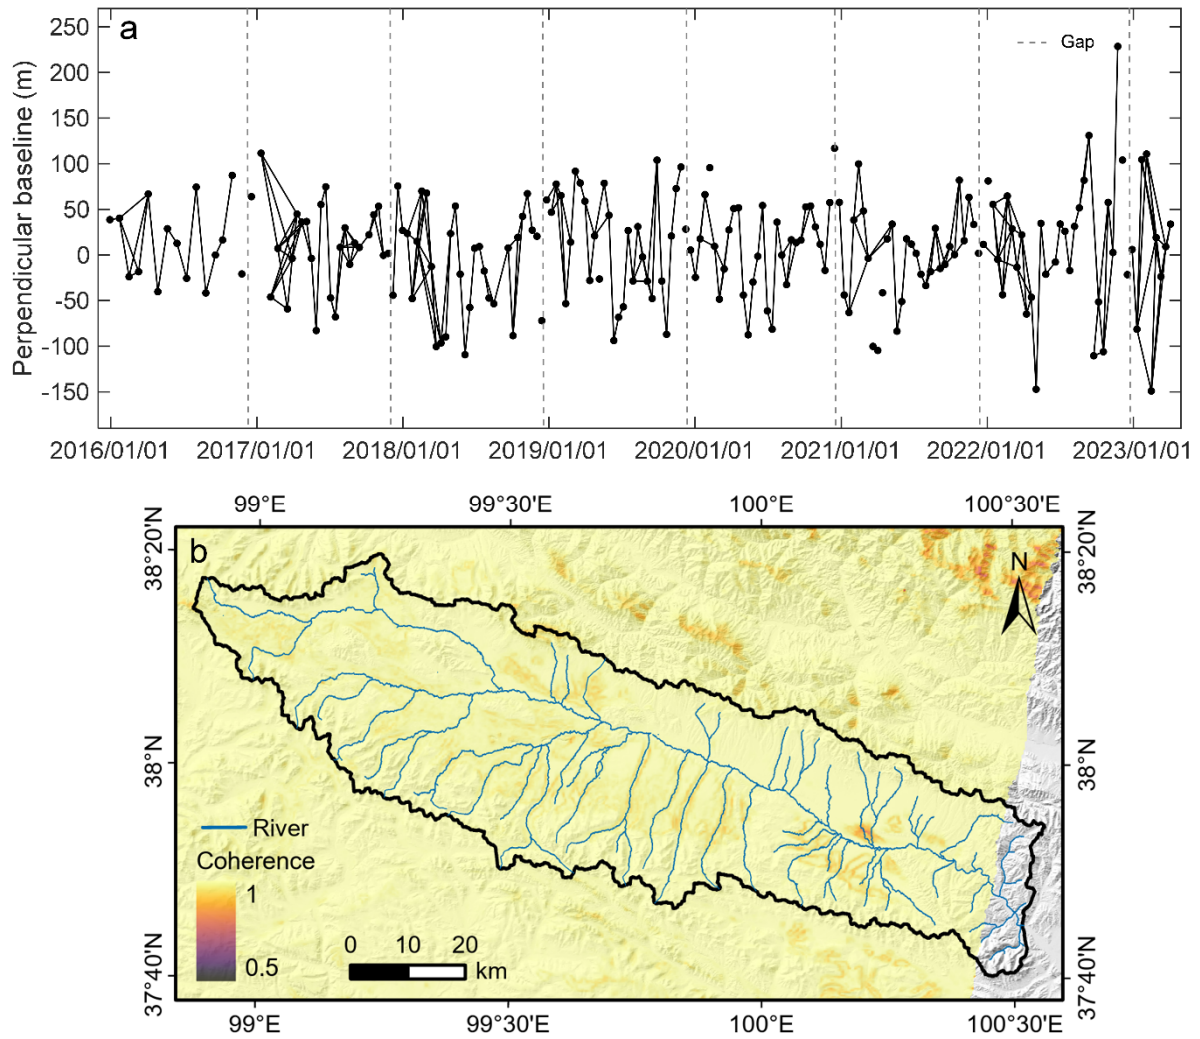

**Figure S2** Sentinel-1 interferogram network (a) and average spatial coherence (b).

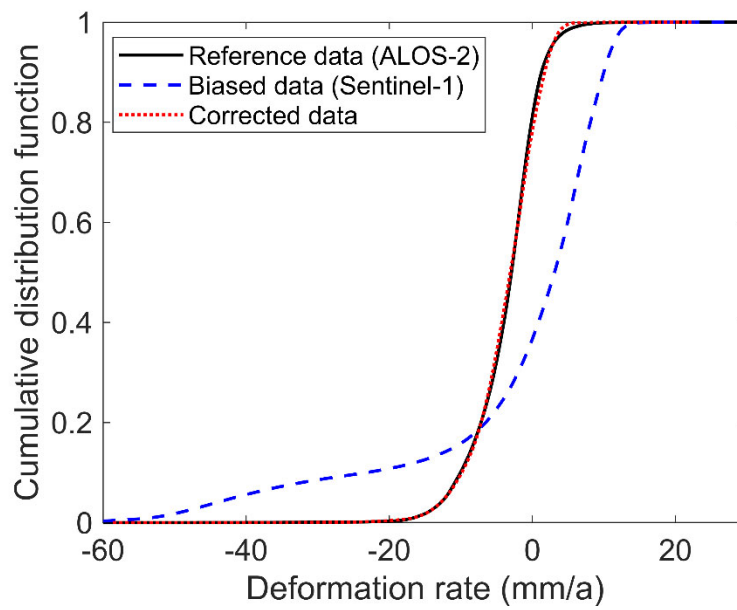

**Figure S3** Cumulative distribution function (CDF) matching between Sentinel-1 and ALOS-2 deformation rates. The initial Sentinel-1 deformation rates were corrected to align with the reference ALOS-2 data.



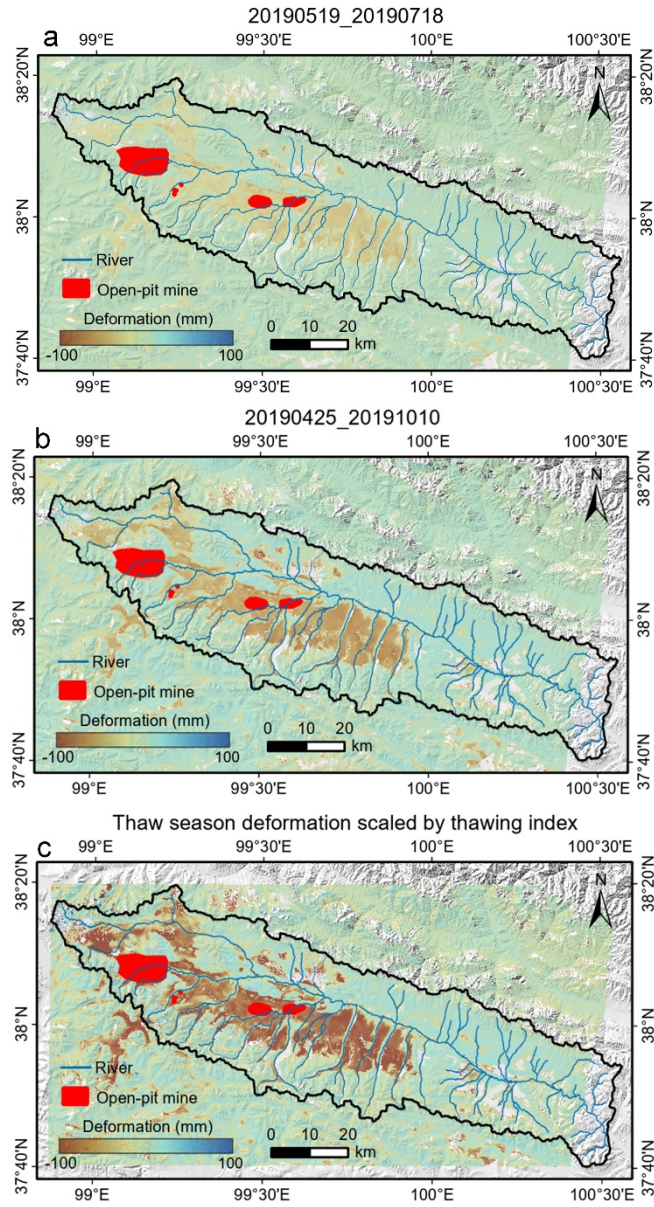

**Figure S4** Comparison between actual observed thaw-season deformation and thaw-season deformation scaled using the thawing index. (a) Partial-season deformation from May–July 2019 derived from the Sentinel-1 interferogram network. (b) Actual observed thaw-season deformation in 2019 from Sentinel-1. (c) Thaw-season deformation scaled using the thawing index.



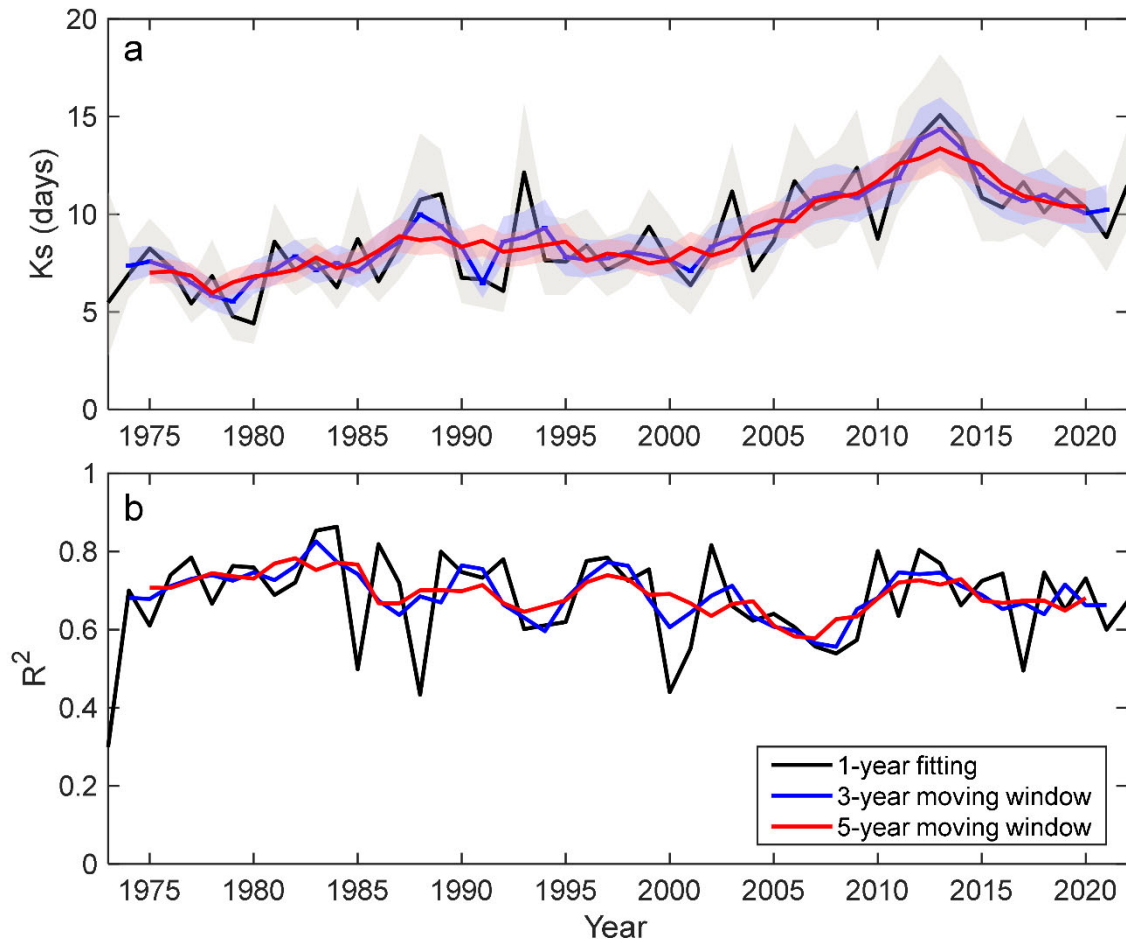

**Figure S5** Time series of streamflow recession time constant ( $K_s$ ) and model goodness-of-fit ( $R^2$ ). (a)  $K_s$  time series derived from 1-year fitting (black line), 3-year moving-window fitting (blue line), and 5-year moving-window fitting (red line), with shaded areas representing the 95% confidence intervals. (b) Goodness-of-fit ( $R^2$ ) of  $K_s$  estimates obtained using 1-year fitting (black line), 3-year moving-window fitting (blue line), and 5-year moving-window fitting (red line).

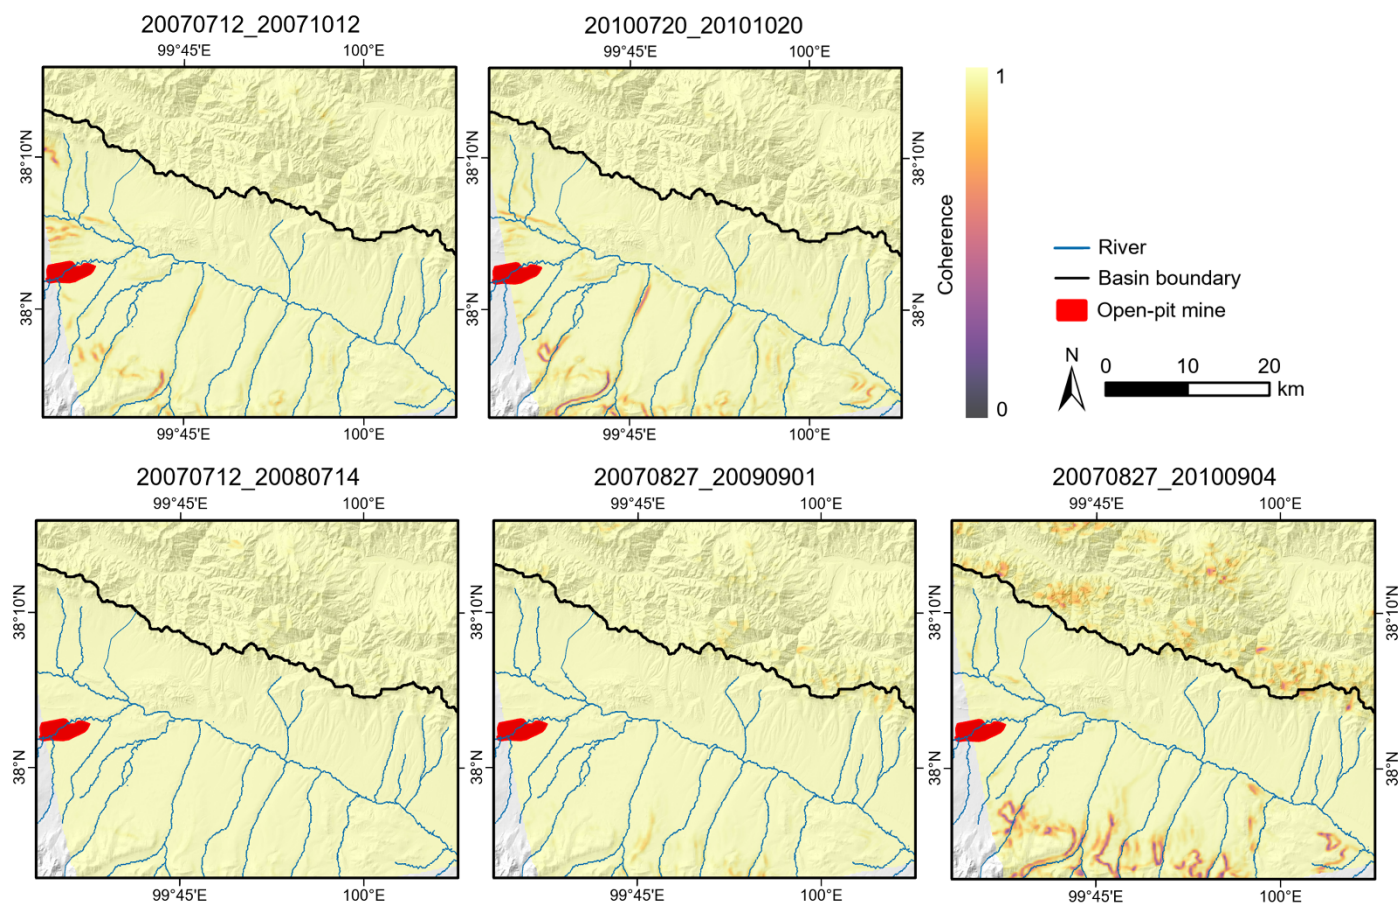

**Figure S6** The coherence maps of the interferograms from ALOS-1.

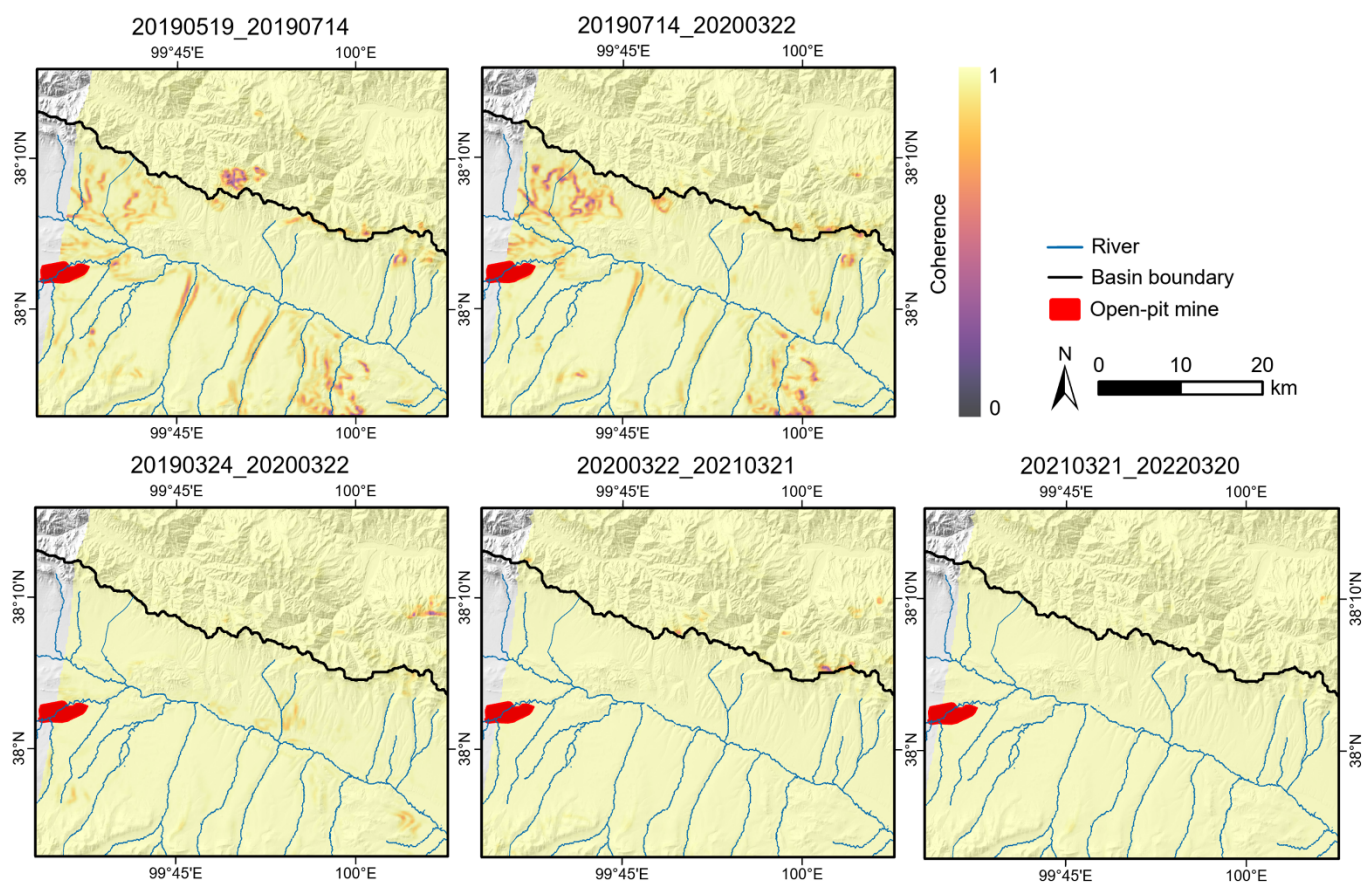

**Figure S7** The coherence maps of the interferograms from ALOS-2.



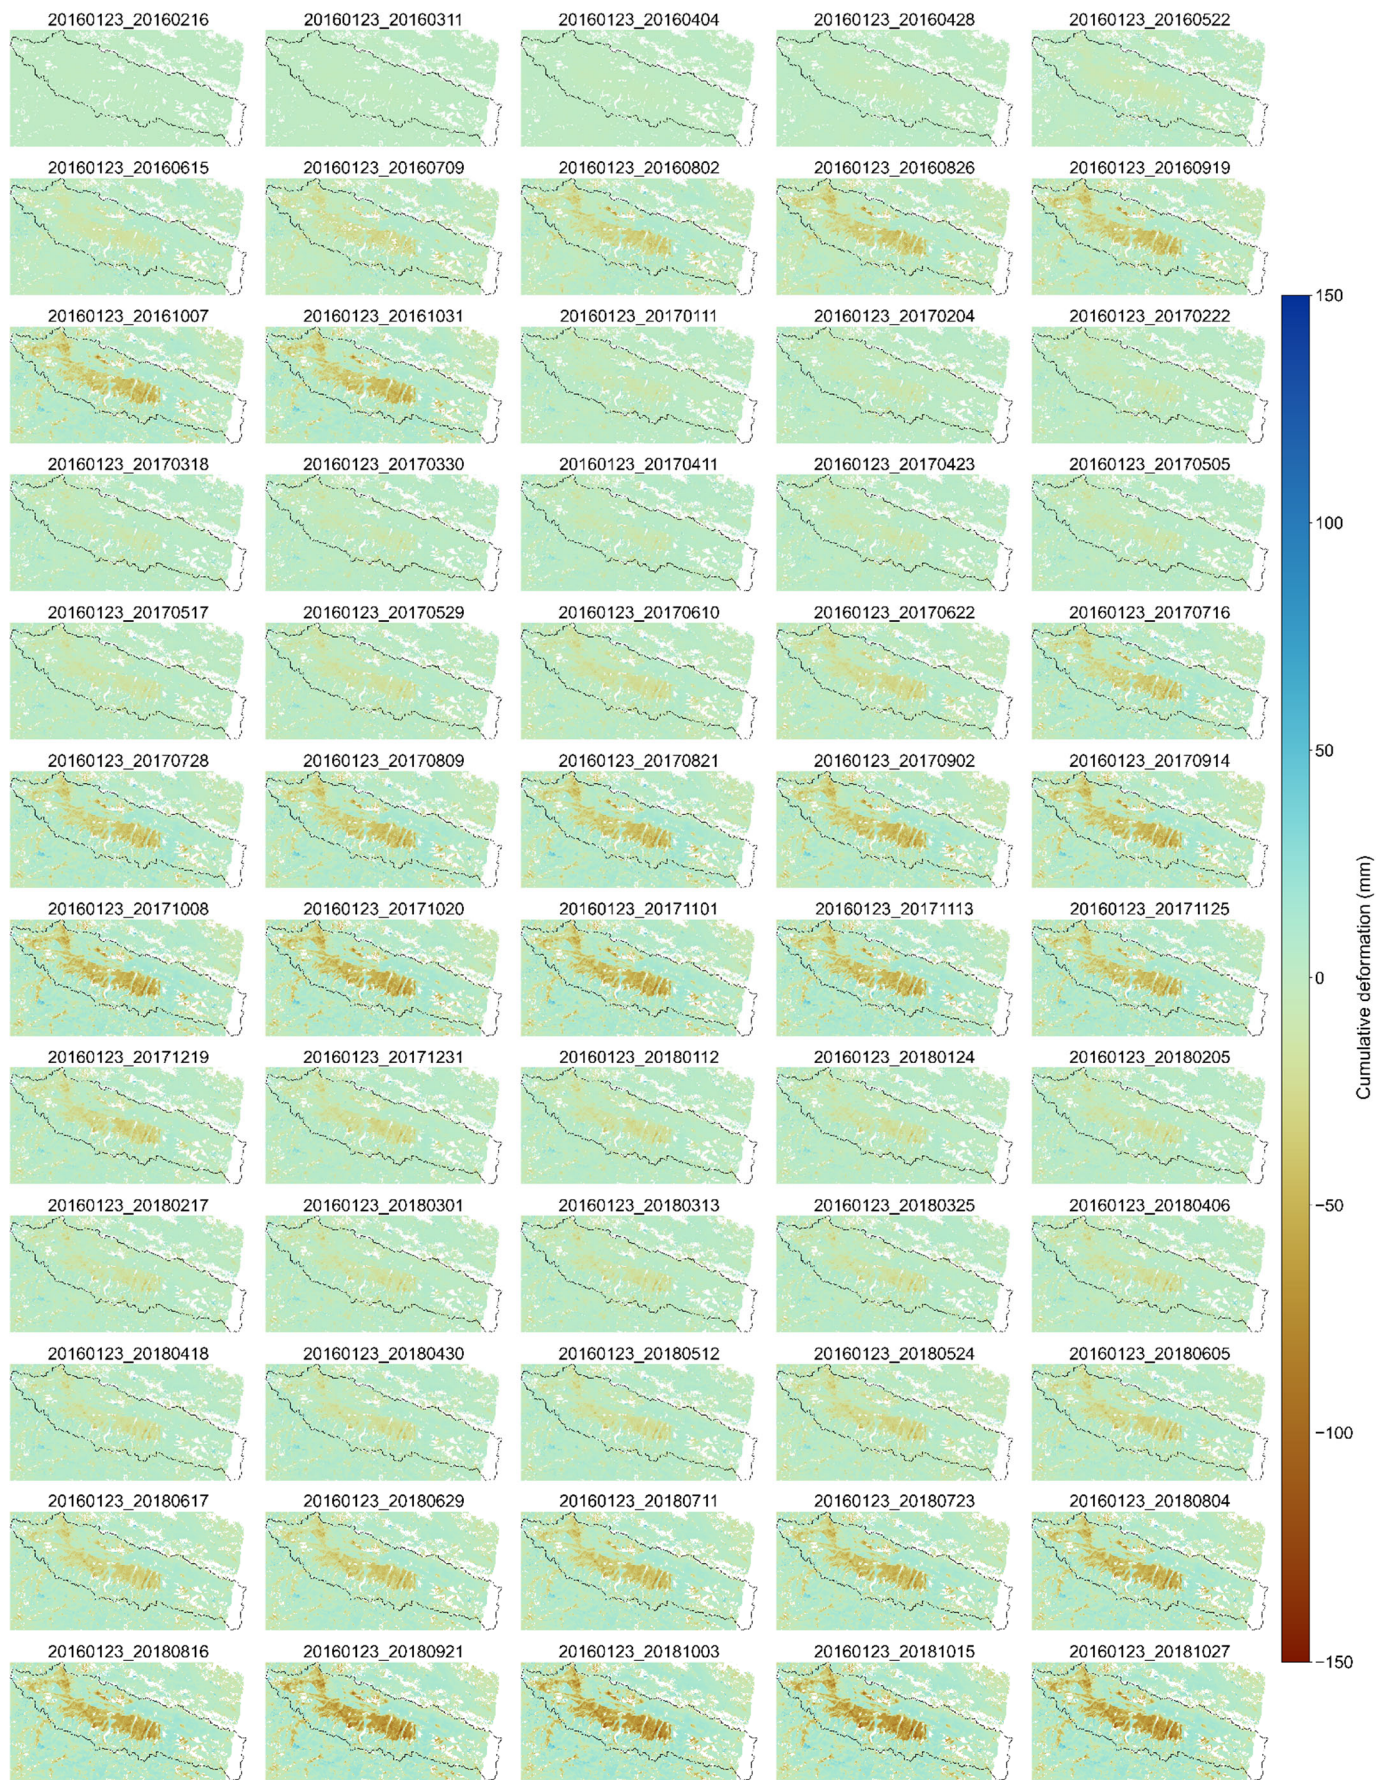



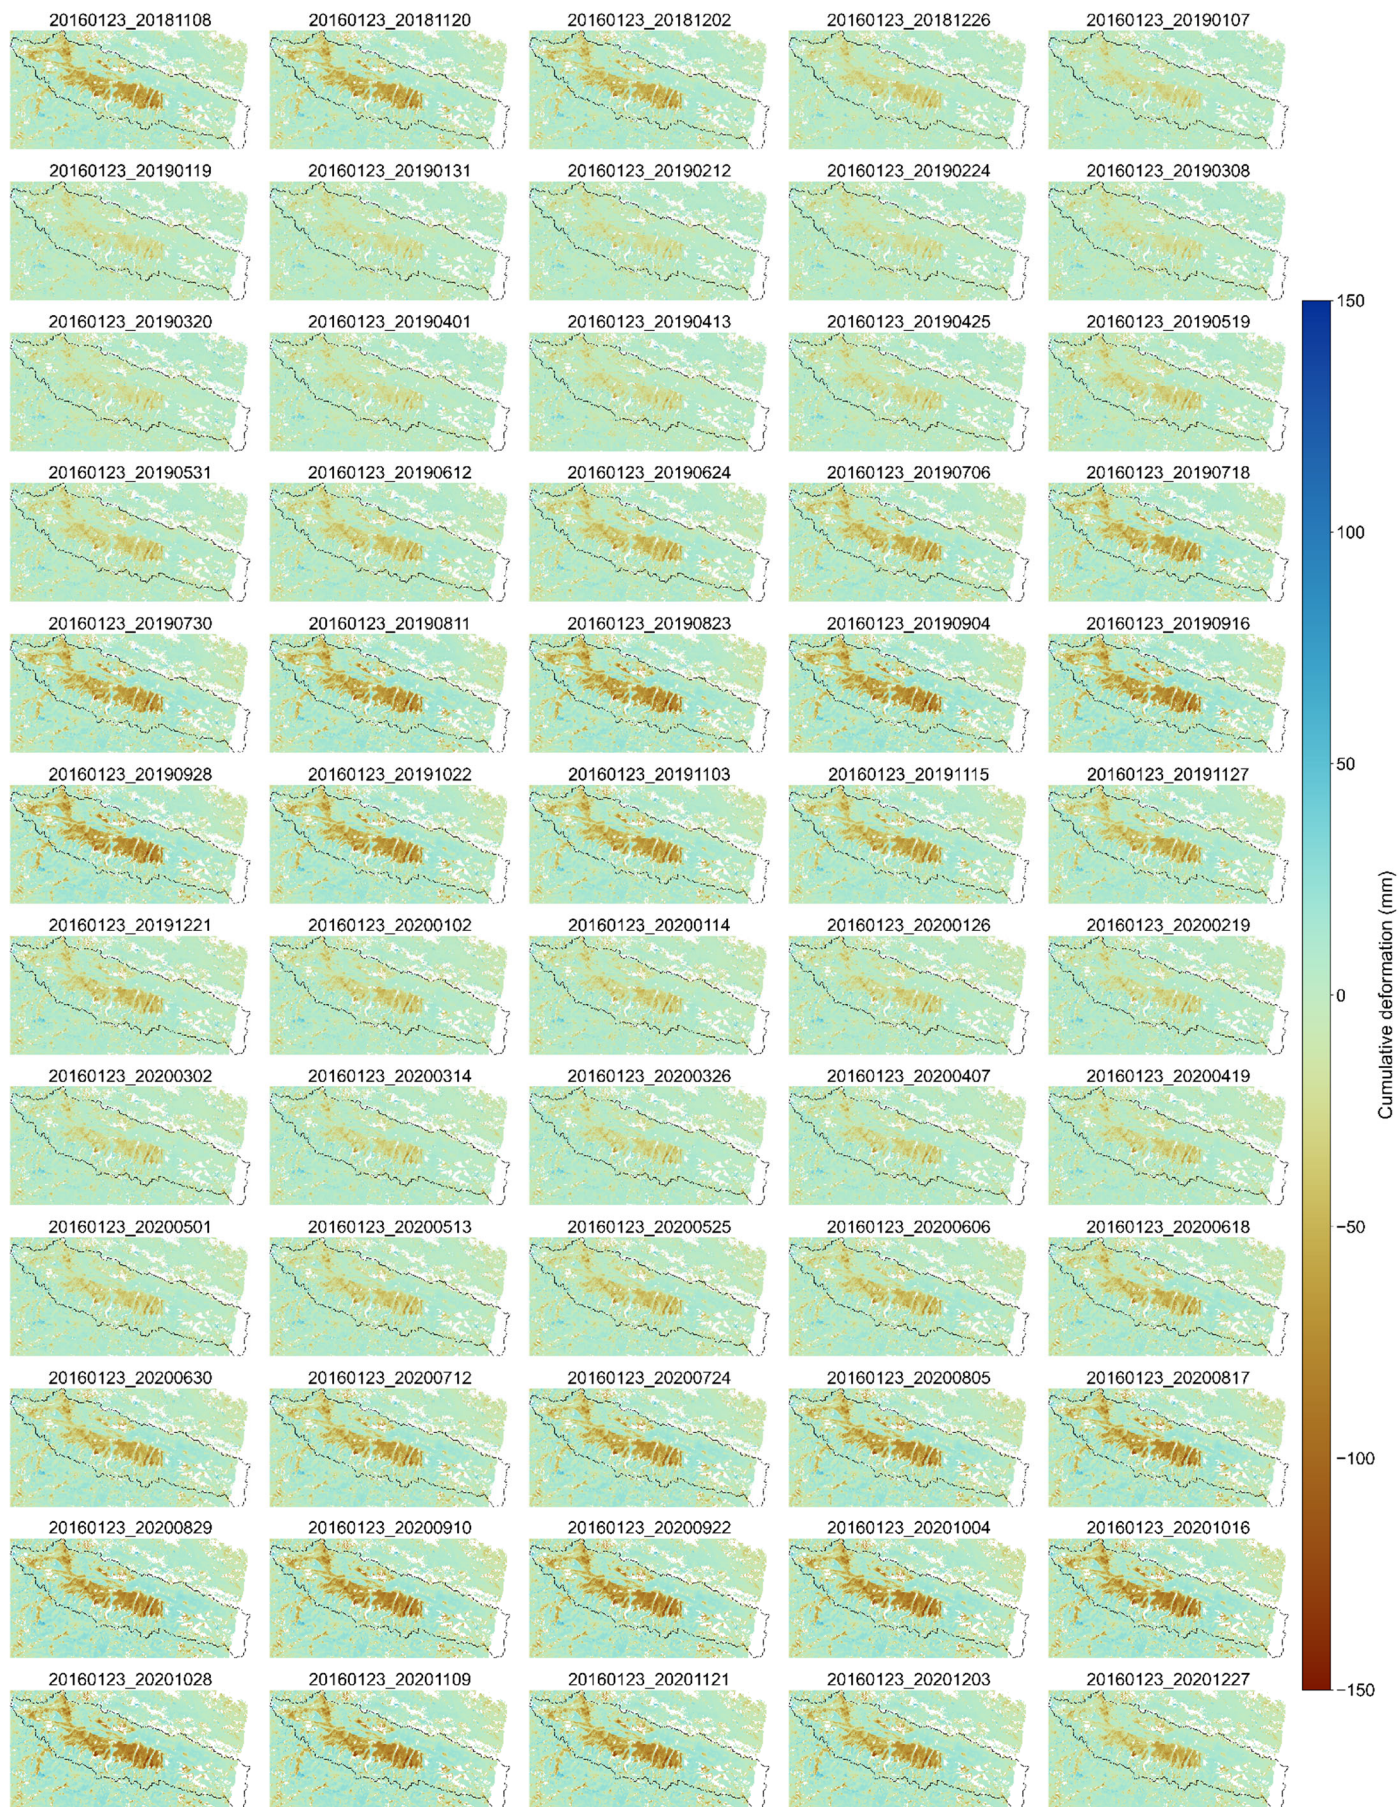



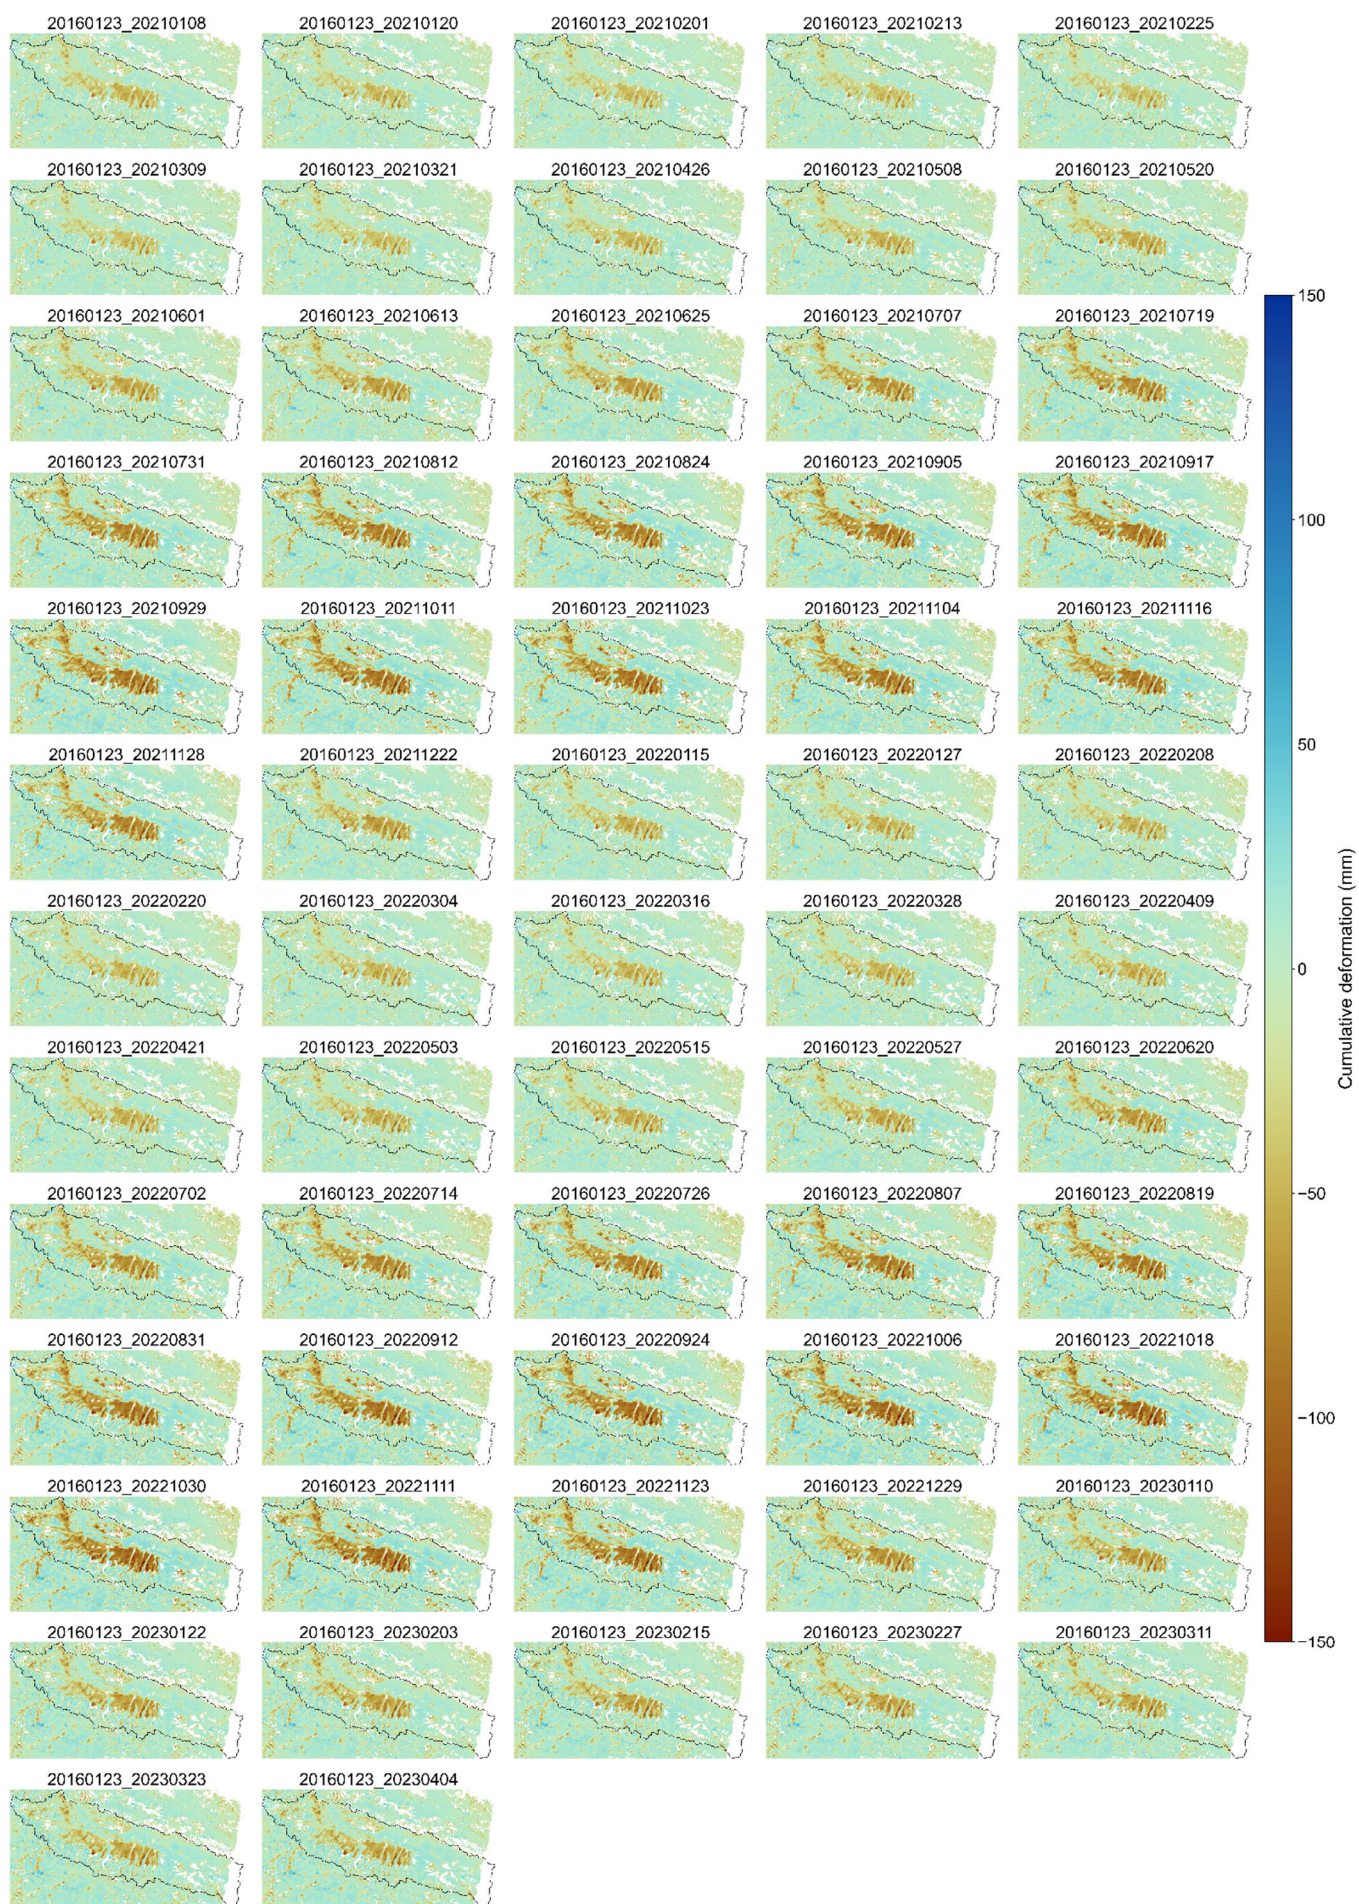

**Figure S8** Time series of cumulative surface deformation from 2016 to 2023, referenced to the first acquisition date.



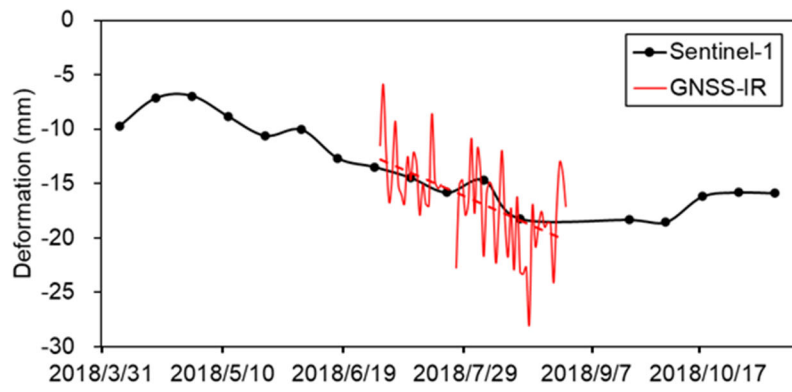

**Figure S9** Comparison between Sentinel-1 InSAR deformation time series and GNSS-IR (GNSS Interferometric Reflectometry) measurements (Zhang et al., 2021) at the Yakou station during the snow-free period in 2018.

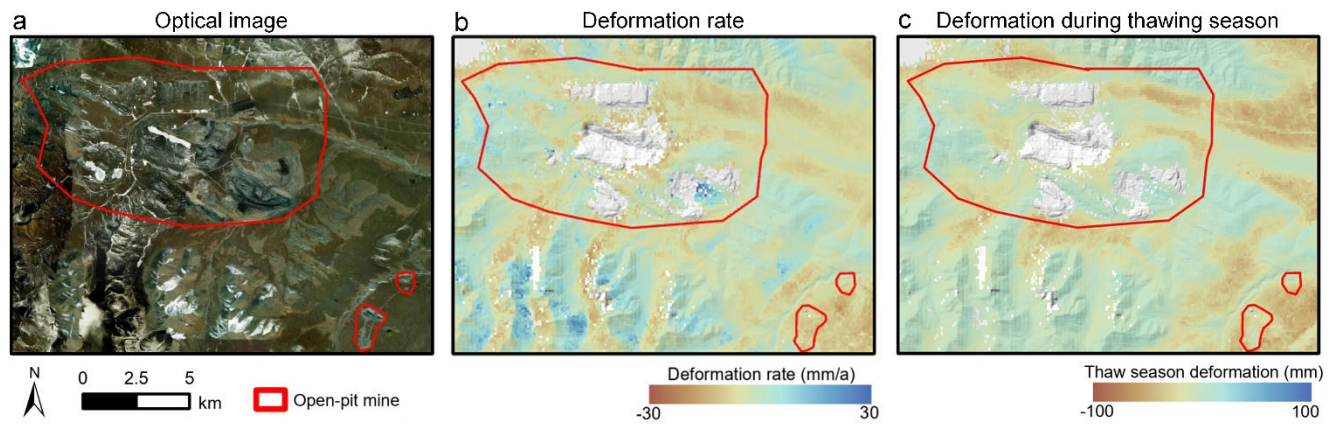

**Figure S10** (a) Optical image of the open-pit mine in the western study area from Esri | Powered by Esri. (b) Deformation trend and (c) thaw-season deformation in its surroundings.

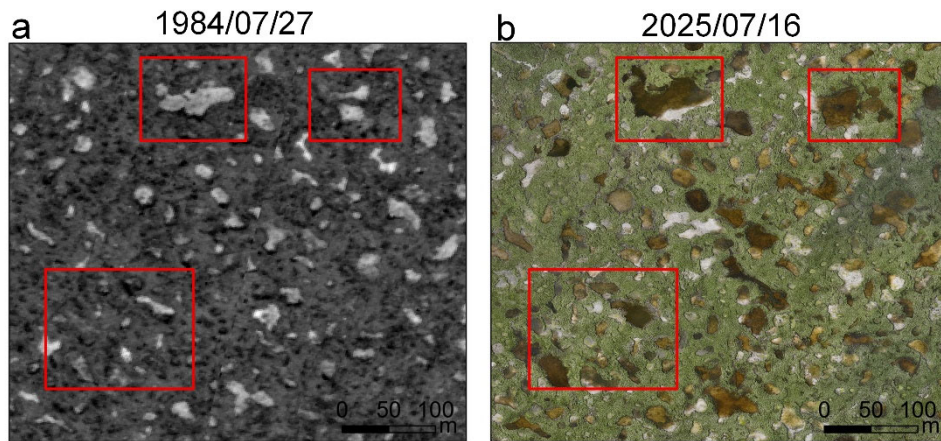

**Figure S11** Comparison of ground surface characteristics at the P1 site near the Jianggang open-pit mine on July 24, 1984 from Keyhole-9 data provided by the U.S. Geological Survey (a) and on July 16, 2025 from UAV data acquired by the authors (b).



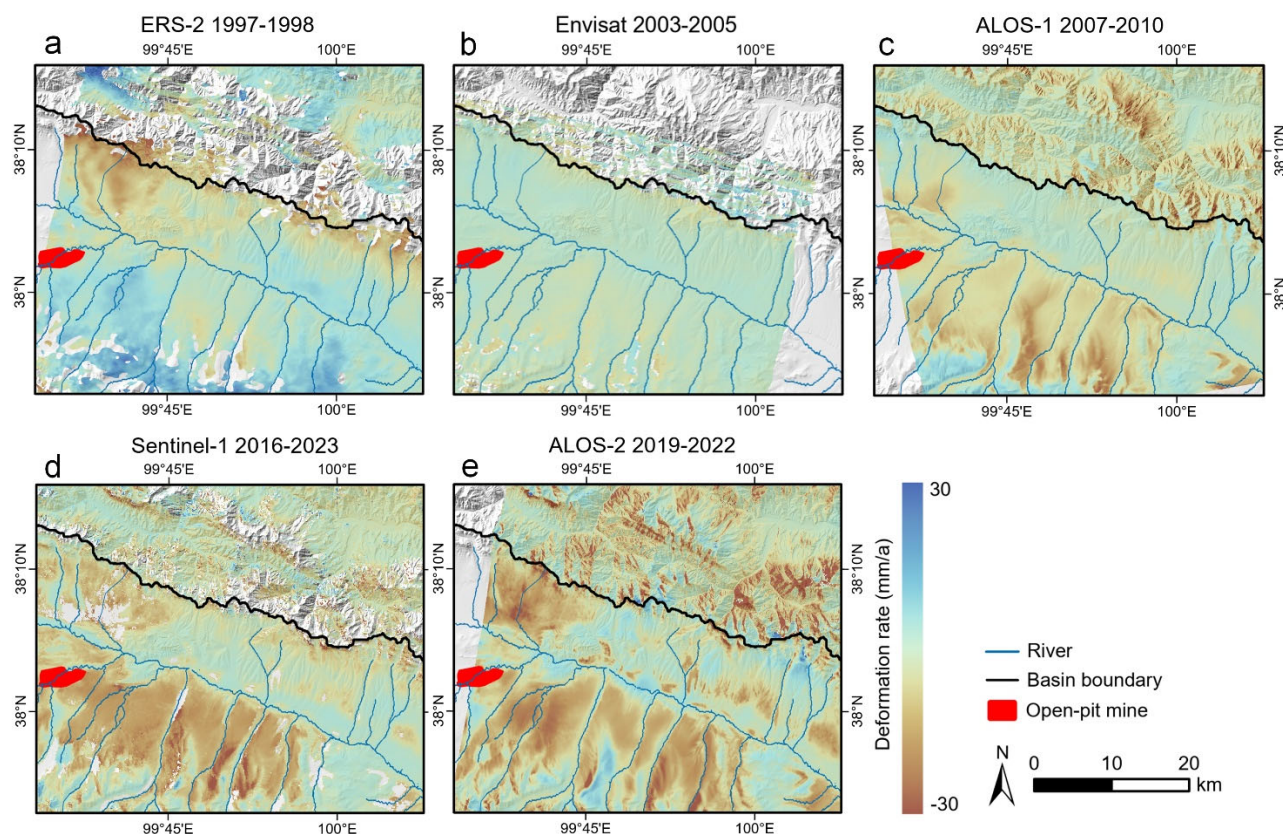

**Figure S12** Vertical deformation rate maps during different periods derived from multi-source SAR data.

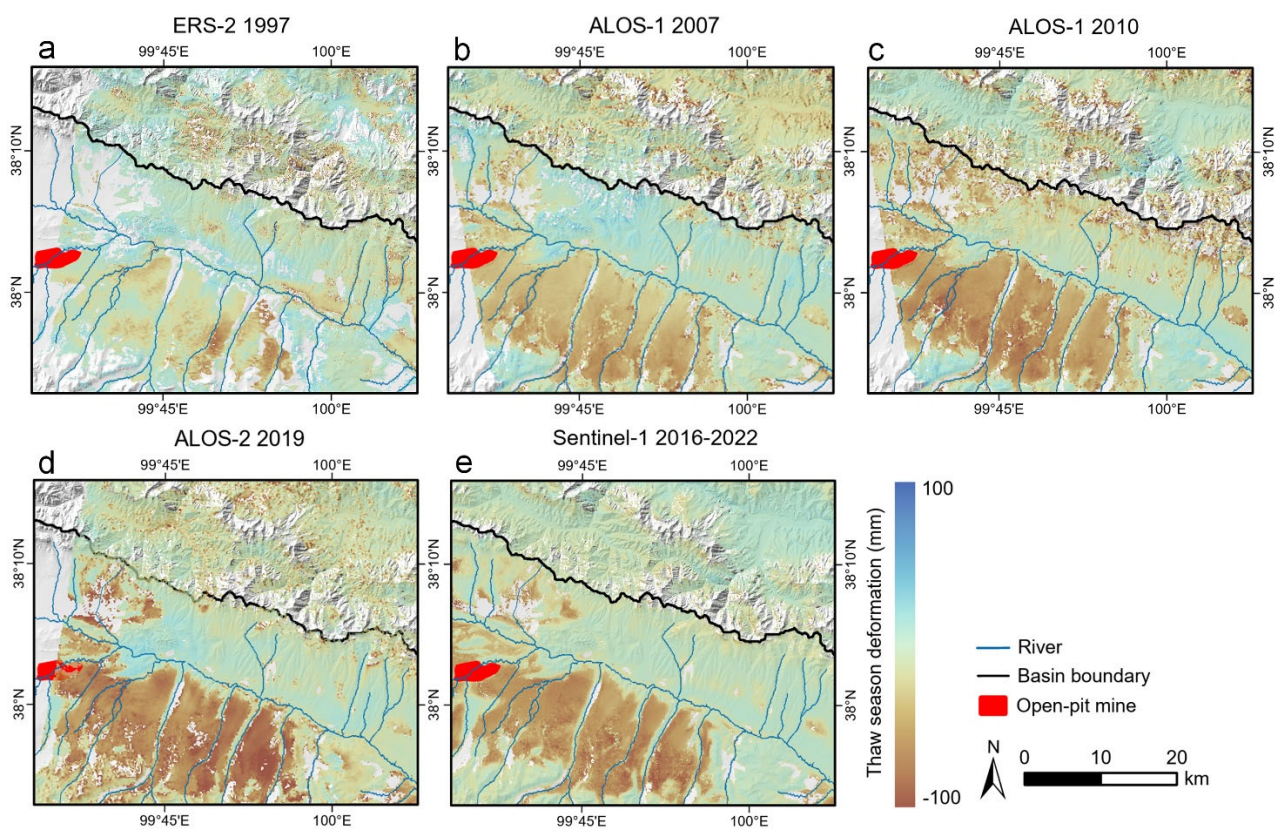

**Figure S13** Vertical thaw-season deformation maps during different periods derived from multi-source SAR data.
